# Supplementary material for: Associations between autism spectrum disorder and eating disorders with and without self-induced vomiting: an empirical study
Source: Research Square preprint supplement (doi:10.21203/rs.3.rs-30266/v3), 2020-11-10
Supplement: Supplementary file 1 [file 07663a41b7a81ace7327635f.xlsx]

## Sheet: Table(1)
Table 1. Clinical profiles of the 42 patients
	BN	AN-BP	AN-R	BED	Kruskal- Wallis analyses
	n = 23	n = 8	n = 6	n = 5		H		Multiple Comparisons by Steel-Dwass
	Mean (SD)	Mean (SD)	Mean (SD)	Mean (SD)
Illness Duration	6.4 (5.8)	10.0 (6.7)	1.9 (1.7)	4.6 (3.7)		8.2*		AN-BP > AN-R
BMI	20.4 (2.4)	17.0 (0.7)	15.6 (1.5)	24.3 (7.0)		26.3**		BN > AN-BP,BN > AN-R, AN-BP < BED, AN-R < BED
Age	27.0 (7.0)	28.1 (7.0)	18.6 (4.8)	28.7 (11.2)		8.3*		N.S
EDE-Q
Diagnosis	74.5 (40.8)	78.8 (39.4)	15.2 (11.5)	62.2 (45.8)		12.8**		BN > AN-R, AN-BP > AN-R
Restricting	3.4 (1.7)	5.2 (1.0)	2.4 (1.5)	4.0 (1.6)		10.7*		AN-BP > AN-R
Eating concern	3.4 (1.5)	4.9 (0.6)	2.0 (1.4)	3.8 (1.9)		10.9*		AN-BP > AN-R
Weight	4.4 (1.4)	5.4 (0.6)	2.6 (1.9)	5.2 (0.5)		10.2*		AN-BP > AN-R
Shape	4.6 (1.4)	5.1 (0.7)	2.8 (1.8)	5.3 (0.5)		6.58		N.S
Global Score	3.9 (1.3)	5.0 (0.5)	2.4 (1.6)	4.5 (0.9)		10.5*		AN-BP > AN-R
AQ
Total score	22.1 (6.4)	25.3 (4.8)	26.0 (7.5)	32.4 (6.2)		7.56		N.S
Social skills	4.7 (2.5)	5.1 (2.6)	5.7 (3.6)	8.0 (1.0)		7.8*		N.S
Attention Switching	5.7 (1.9)	7.1 (1.6)	6.2 (1.8)	6.4 (1.5)		2.87		N.S
Attention to detail	3.5 (2.0)	5.3 (3.3)	4.0 (1.7)	7.6 (2.5)		9.4*		BN < BED
Communication	3.8 (2.3)	4.4 (1.1)	6.0 (2.1)	6.2 (1.3)		8.7*		N.S
Imagination	4.4 (2.0)	3.4 (1.8)	4.2 (1.5)	4.2 (2.2)		2.19		N.S
BN: Bulimia Nervosa; AN-BP: Anorexia Nervosa Binge Purging; AN-R: Anorexia Nervosa Restricting; BED: Binge Eating Disorder; BMI: Body Mass Index; EDE-Q: Eating Disorder Examination Questionnaire; AQ: Autism Spectrum Quotient. **p < 0.01, *p < 0.05

## Sheet: Table (2)
	Table 2. Comparison of AQ scores by the presence or absence of self-induced vomiting (n = 42)
		BN,AN-BP Vomiting(+)	AN-R,BED Vomiting(-)	Mann– Whitney
		n = 31	n = 11
		Mean(SD)	Mean(SD)	U		r
	Duration	7.3 (6.2)	3.1 (3.0)	100.5	*	0.31
	BMI	19.5 (2.6)	19.6 (6.5)	132.5
	Age	27.3 (6.9)	23.2 (9.5)	111
	EDE-Q
	Diagnosis	75.6 (39.8)	36.5 (38.8)	67.5	**	0.46
	Restricting	3.9 (1.7)	3.1 (1.7)	116
	Eating concern	3.8 (1.5)	2.8 (1.8)	112
	Weight	4.6 (1.3)	3.7 (1.9)	123.5
	Shape	4.7 (1.3)	3.9 (1.8)	140
	Global Score	4.2 (1.2)	3.4 (1.7)	120
	AQ
	Total score	22.9 (6.1)	28.9 (7.4)	102.5
	Social skills	4.8 (2.5)	6.7 (2.9)	89.5	*	0.36
	Attention Switching	6.0 (2.0)	6.3 (1.6)	153
	Attention to detail	3.9 (2.5)	5.6 (2.7)	103
	Communication	4.0 (2.1)	6.1 (1.7)	71.5	**	0.44
	Imagination	4.2 (2.0)	4.2 (1.7)	166
	AN, anorexia nervosa (either -R for restricting or -BP for binge eating with self-induced vomiting); AQ, Autism Spectrum Quotient; BMI, body mass index; BN, bulimia nervosa; BED, binge eating disorder; EDE-Q, Eating Disorder Examination Questionnaire. **p<0.01 *p<0.05

## Sheet: Table (3)
Table 3. Comparison AN-BP to AN-R and BN to BED (n = 42)
	Anorexic (n = 14)	Bulimic (n = 28)
	(AN-BP vs AN-R)	(BN vs BED)
	p(Mann-Whitney)	p(Mann-Whitney)
Illness duration	0.00*	0.83
BMI	0.05*	0.17
Age	0.01*	0.61
SAS	0.02*	0.37
SS	0.01*	0.01*
Diagnosis	0.00*	0.47
Restricting	0.01*	0.65
Eating concern	0.00*	0.7
Weight	0.01*	0.31
Shape	0.03*	0.25
Global score	0.00*	0.42
AQ Total	0.8	0.01*
Social skills	0.6	0.00*
Attention switching	0.47	0.39
Atention to detail	0.6	0.00*
Communication	0.11	0.03*
Imagination	0.32	0.88
AN, anorexia nervosa (either -R for restricting or -BP for binge eating with self-induced vomiting); AQ, Autism Spectrum Quotient; BMI, body mass index; BN, bulimia nervosa; BED, binge eating disorder; EDE-Q, Eating Disorder Examination Questionnaire. *p<0.05

## Sheet: Table (4)
Table 4.
Multivariate analysis of AQ and EDE-Q of 4 groups in illness duration with Kruskal-Wallis analysis
	AQ：Communication			statistic H = 8.38			df = 3 , p<.05
Group	N	Mean	SD	Max	Min	Average of the rank
1	9	3.78	2.1	7	0	17.83
2	8	6.25	1.48	9	4	31.44
3	22	4.05	2.03	9	0	18.5
4	3	5.67	1.89	7	3	28
== Multiple Comparisons by Steel-Dwass == (* p < .05)
A2 > A3 * (T = 2.656)
EDE-Q: Diagnosis				statistic H = 12.44			df = 3 , p<.01
Group	N	Mean	SD	Max	Min	Average of the rank
1	9	75.44	37.27	141	21	24.78
2	8	21.38	13.9	46	4	7.75
3	22	75.68	39.9	139	10	24.84
4	3	77	47.55	132	16	23.83
== Multiple Comparisons by Steel-Dwass == (* p<.05)
A1 > A2 * (T = 3.081)
A2 < A3 * (T = 3.332)
Group1: <4 years of illness duration, Vomiting(+); Group2: <4 years of illness duration, Vomiting(-).
Group3: ≥4 years of illness duration, Vomiting(+); Group4: ≥4 years of illness duration, Vomiting(-)
N: Number of subjects; Mean:Mean value; SD:Standard Daviation; Max:Maximum value; Min:Minimun value
df: degrees of freedom

## Sheet: Table (5)
Table 5. Number and ratio of people who exceeded the AQ cut-off value by ED subtype (n = 42)
	BN	AN-BP	AN-R	BED	Fisher	Cramer's
AQ score	n (%)	n (%)	n (%)	n (%)	χ2	V
AQ≧33	1 (4.3) 3.29	1 (12.5) 1.14	1 (16.7) 0.86	3 (60.0) 0.71	10.4*	0.5
AQ≦32	22(95.7) 19.71	7(87.5) 6.86	5(85.7) 5.14	2(40.0) 4.29
AN, anorexia nervosa (either -R for restricting or -BP for binge eating with self-induced vomiting); AQ, Autism Spectrum Quotient; BN, bulimia nervosa; BED, binge eating disorder. * p<0.05
